# Supplementary material
Source: bioRxiv or medRxiv preprint supplement (https://www.biorxiv.org/highwire/filestream/328/field_highwire_adjunct_files/0/001248-1.pdf)
Supplement: Supplementary file [file 001248-1.pdf]

## Supporting text

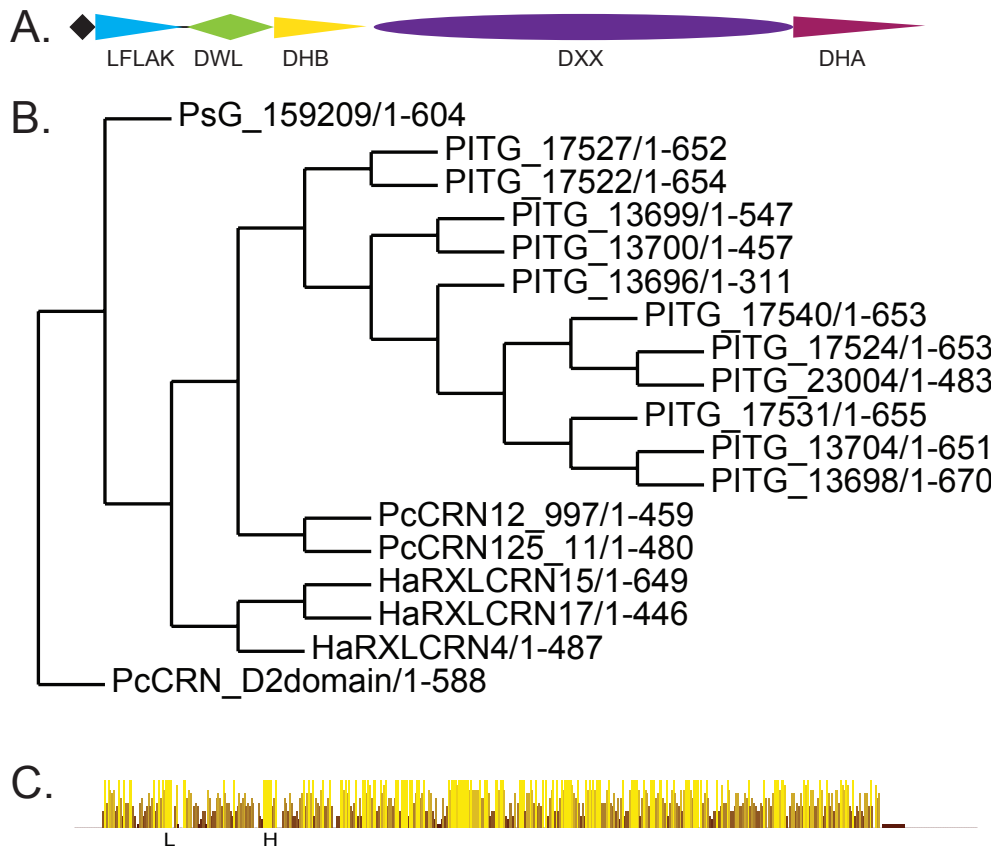

### Figure S1

DHB-DXX-DHA domain containing CRN effectors and their conservation.

A) Diagram showing domain structure for the CRN effectors used in this study. CRNs contain a non-canonical putative signal peptide (black diamond), two highly conserved N-terminal domains and three separate C-terminal domains. B) Phylogenetic reconstruction of DHB-DXX-DHA domain containing CRNs, based on maximum likelihood clustering of only the C-terminal domains using 100 bootstraps. C) Conservation motif for DHB-DXX-DHA domain containing Hpa and PcCRNs. Bright yellow bars show highly conserved parts (80% similarity – 100% identical), darker bars are more divergent. LFLAK and HVLVVVP domain are indicated with L and H respectively.

```

AtTCP14/1-489      1 MQKPTSSILNVIMDGGDSVGGGGGDDHHRHLHHHR-----PTFPQLLGKHD 49
tTCP14-1/1-416    1 -----MEGGGGDDHLHH-HHHNHQHHQHQQYRPNFPFQLLEKKE- 40
tTCP14-2/1-410    1 -----MDGGGGDDHLQRHQHNHRSI-----ATFPQLLEKKE- 32

AtTCP14/1-489     50 DDNHQQQPSPSSSSSLFSLHQHQLSQSQPQSQSQKSPQTTQKELQQTQEE SAVVAKK 109
tTCP14-1/1-416    41 -----DEPCSSSSAANNINYP SLAISP SDTNTNINPNS-----NDLQITVAST-ETAKK 88
tTCP14-2/1-410    33 -----DEACSSSSNAAAAYTTSLAISNTD-NTHTNPNTPRSTISTLQISASGA-DT SKK 85

AtTCP14/1-489     110 PP LKRA STKDRHTKVDGRGRRIRMP ALCAARVFQLTREL GHKSD GETIEWLLQQAEP SVI 169
tTCP14-1/1-416    89 PA PKRT STKDRHTKVDGRGRRIRMP ALCAARVFQLTREL GHKSD GETIEWLLQQAEP AVI 148
tTCP14-2/1-410    86 PPP KRT STKDRHTKVDGRGRRIRMP ALCAARVFQLTREL GHKSD GETIEWLLQQAEP AVI 145

AtTCP14/1-489     170 AATGTGTIPANFTSLNISLRSSGSSMSLP SHFRSAASTFSPNNIFSPAMLQQQQQQQRGG 229
tTCP14-1/1-416    149 AATGTGTIPANFTSLNISLRSSGSSMSVPSQLRSS-----YFNPNFSLQRRSLF-Q 199
tTCP14-2/1-410    146 AATGTGTIPANFTSLNISLRSSGSSMSVPSQLRSS-----YFNPNFSLQRRGLFP 197

AtTCP14/1-489     230 GVG FHHPHLQGRAPTSSLFP GIDNFTPTTSLNLFHNPTKQEGDQDS EELNSEK-----K 283
tTCP14-1/1-416    200 GIGLS-----SDRSATTTLL-----NFQTGNSNLH-QFQAKQEMRDNSLDLLET S-IEESLS 249
tTCP14-2/1-410    198 GIGLS-----TDT SATTLL-----NFQSANLSSNIQLQTKPELRDNSIDLTESSPAEDNLS 248

AtTCP14/1-489     284 RR IQTTSDLHQQQQHQH-----DQIGGYTLQSSNSGSTATAAAAQQIPGNFWMVAAAAA 339
tTCP14-1/1-416    250 RKRRLDLDLQEQQQNQQQNEQQMGSYLLQSSSSGTMP TSHSS--IPANFWMLTN---- 303
tTCP14-2/1-410    249 RKRRLDLDLEQQQHQQQ-----QQMGSYLLQSS-TGTMP TSHSS--IPANFWMTNP I-- 299

AtTCP14/1-489     340 GGGGGNNNQ TGG LMTASIGTGGGGGEPVWTFP SINTAA---AALYRSGVSGVPSGAVSSG 396
tTCP14-1/1-416    304 -----NNTQV-----LGGDPVWTFP SVNNSGAAAAALYR-----STMSSG 338
tTCP14-2/1-410    300 -----PSNQV-----MGGDP IWP FQSVNSG---ALYR-----GTMP SG 330

AtTCP14/1-489     397 LHF MNFAAPMAFLT GQQQLATT SNHEINEDSNNNEGGRSDGGDHHNTQRHHHQH HHH 456
tTCP14-1/1-416    339 LHF MNFPTPVALLP TQQ-----FGAGSN---GSTLAG-----EGQL 371
tTCP14-2/1-410    331 LQFMNFPTSVALLPSQQ-----LGGSSGGGGGNNGLG-----EGQL 367

AtTCP14/1-489     457 NILSGLNQYGRQVSG--DSQASGSLG---GGDEEDQD----- 489
tTCP14-1/1-416    372 GMVTGLNPY-RPCSGVSESQASGSHSHHGGGGGGDDRHDSTSHHNS 416
tTCP14-2/1-410    368 GMFAGLNPY-RGGGGVSESQASGSHSHH--GGGTDDRHD TSHHS- 409

```

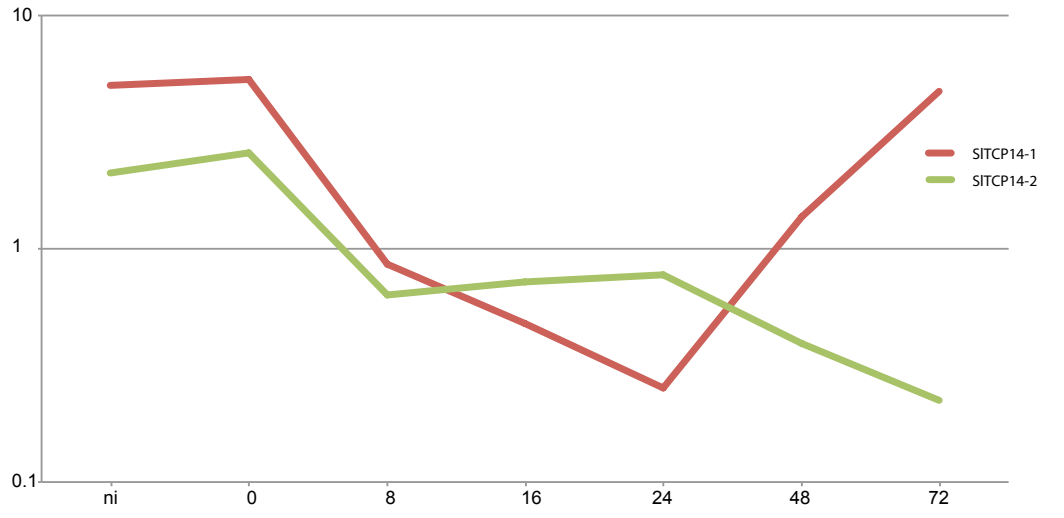

**Figure S2**

TCP transcription factors conservation and expression patterns.

A) MUSCLE alignment of AtTCP14 and two tomato homologues. Levels of similarity are shown in purple (dark = high similarity). Underlined are conserved basic regions, boxed the helices of the Helix Loop Helix motif. Conserved functional Cysteine is marked with \* B) Microarray expression data for tomato TCP14 candidates.

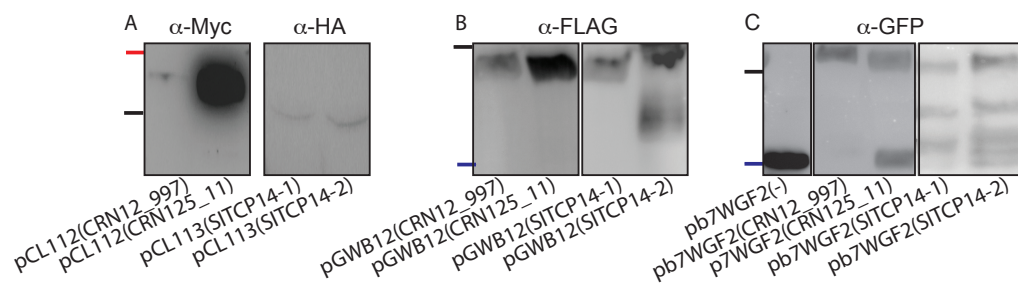

**Figure S3**

Stable expression of fusion proteins used in this study.

A) Fusion proteins for BiFC microscopy. B) Proteins used for phenotyping assays. C) for Co-IP

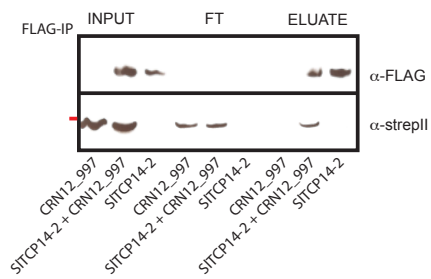

**Figure S04**

Reversed Co-IP of CRN12\_997 and TCP14-2

FLAG-IP of FLAG tagged TCP14-2 co-immunoprecipitates CRN12\_997.
